# Supplementary material for: Short-term overnutrition induces white adipose tissue insulin resistance through sn-1,2-diacylglycerol/PKCε/insulin receptor Thr1160 phosphorylation
Source: PubMed Central journal article supplement (PMC7934919; doi:10.1172/jci.insight.139946), 2021-02-22
Supplement: jciinsight-6-139946-s189.pdf [file jciinsight-6-139946-s189.pdf]

**Figure S1**

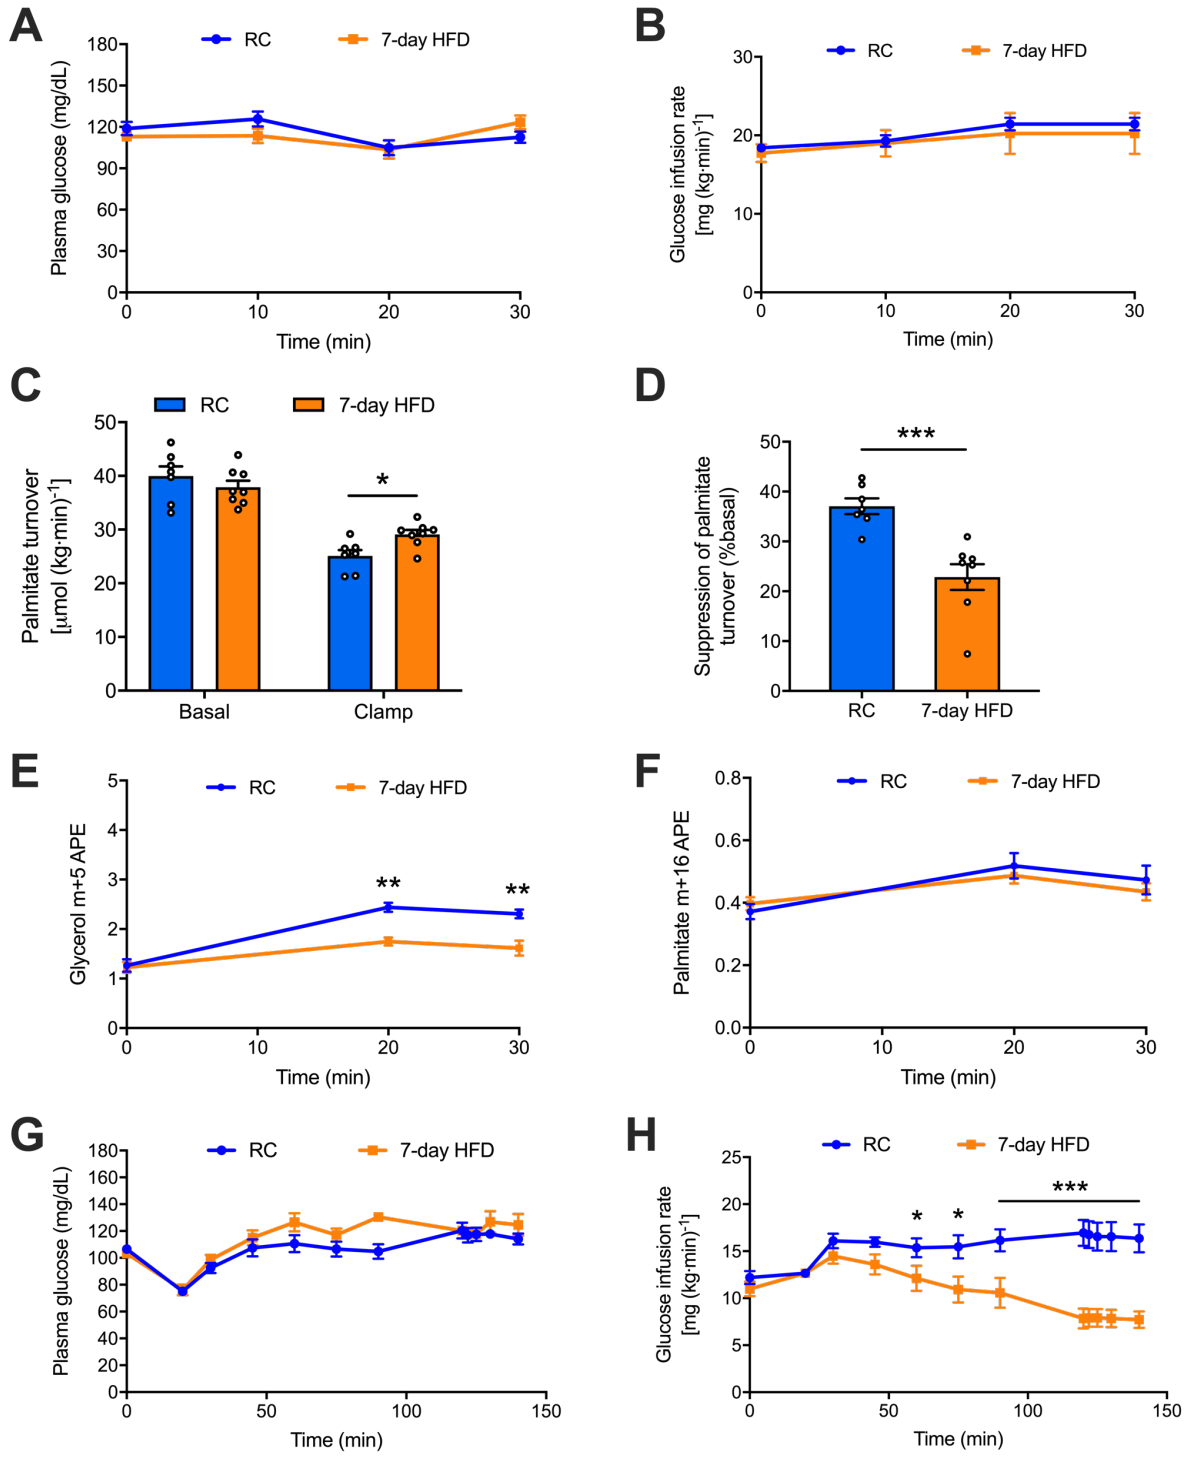

**Figure S1. Hyperinsulinemic-euglycemic clamp studies in RC versus 7-day HFD rats**

(A)-(B) Time course of plasma glucose and glucose infusion rates during a 30-min hyperinsulinemic-euglycemic clamp. (C)-(D) Whole-body palmitate turnover and its suppression by insulin during the clamp. (E)-(F) Time course of plasma glycerol m+5 APE and palmitate m+16 APE during the clamp. (G)-(H) Time course of plasma glucose and glucose infusion rates during a 140-min HEC. In all panels, data are the mean  $\pm$  SEM of  $n = 6-10$  per group, with comparisons by 2-tailed unpaired Student's t-test. \* $P < 0.05$ , \*\* $P < 0.01$ , \*\*\* $P < 0.001$ .

**Figure S2**

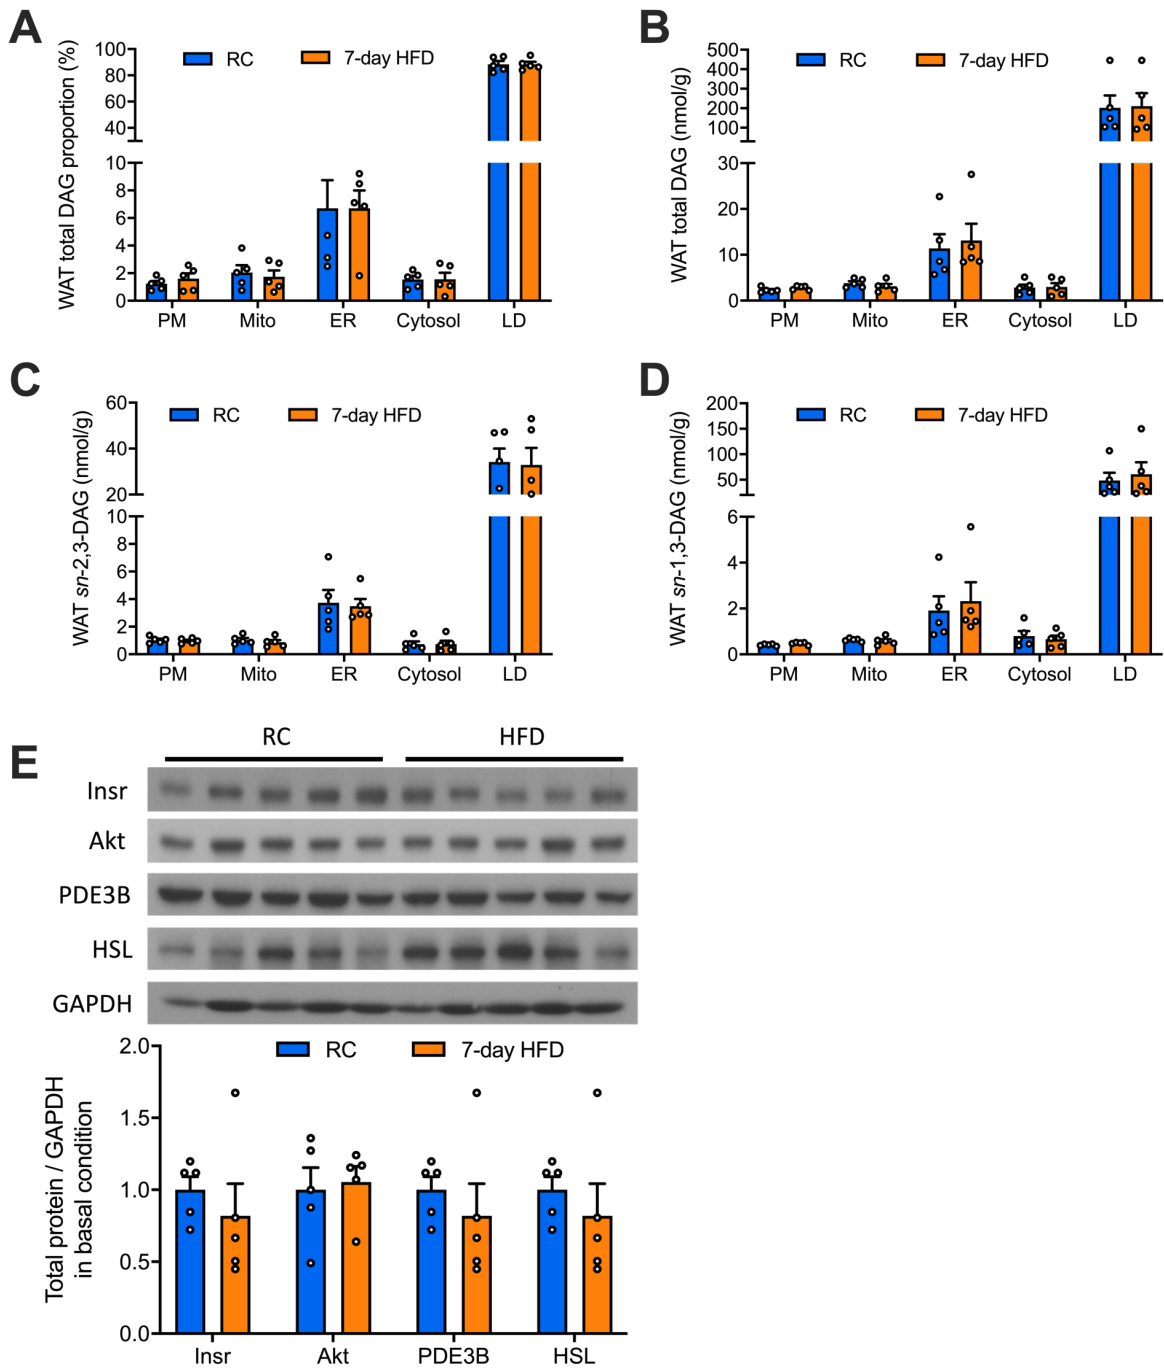

**Figure S2. DAG compartmental profile in WAT of RC versus 7-day HFD rats**

(A) Total DAG proportion in five compartments. (B) WAT total DAG in five compartments. (C) WAT *sn*-2,3-DAGs in five compartments. (D) WAT *sn*-1,3-DAGs in five compartments. (E) WAT basal protein content. In all panels, rats were under basal condition (6-hr fasting), data are the mean  $\pm$  SEM of  $n = 5$  per group, with comparisons by 2-tailed unpaired Student's t-test.

**Figure S3**

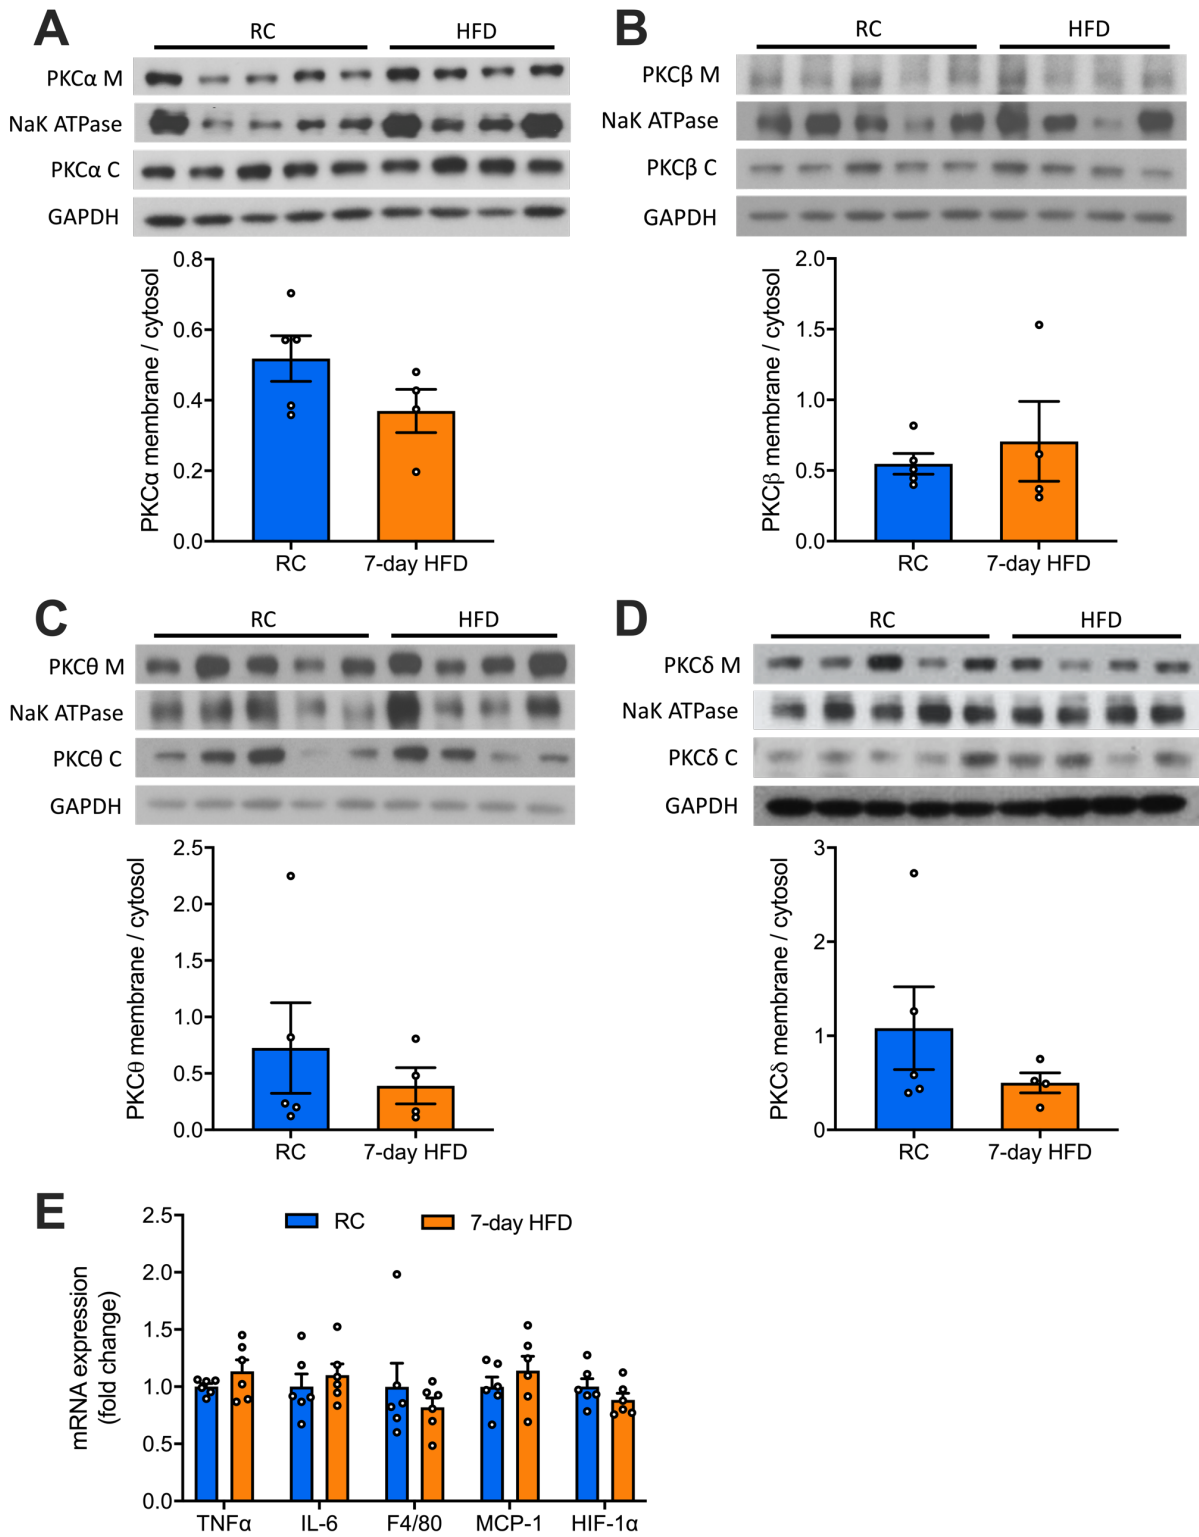

**Figure S3. Translocation of PKC $\alpha$ , PKC $\beta$ , PKC $\theta$ , PKC $\delta$  and gene expression related to inflammation and hypoxia in WAT of RC versus 7-day HFD rats**

(A) WAT PKC $\alpha$  membrane/cytosol ratio. (B) WAT PKC $\beta$  membrane/cytosol ratio. (C) WAT PKC $\theta$  membrane/cytosol ratio. (D) WAT PKC $\delta$  membrane/cytosol ratio. (E) Expression of genes associated with WAT inflammation and hypoxia. In all panels, rats were under basal condition (6-hr fasting), data are the mean  $\pm$  SEM of  $n = 4-6$  per group, with comparisons by 2-tailed unpaired Student's t-test.

**Figure S4**

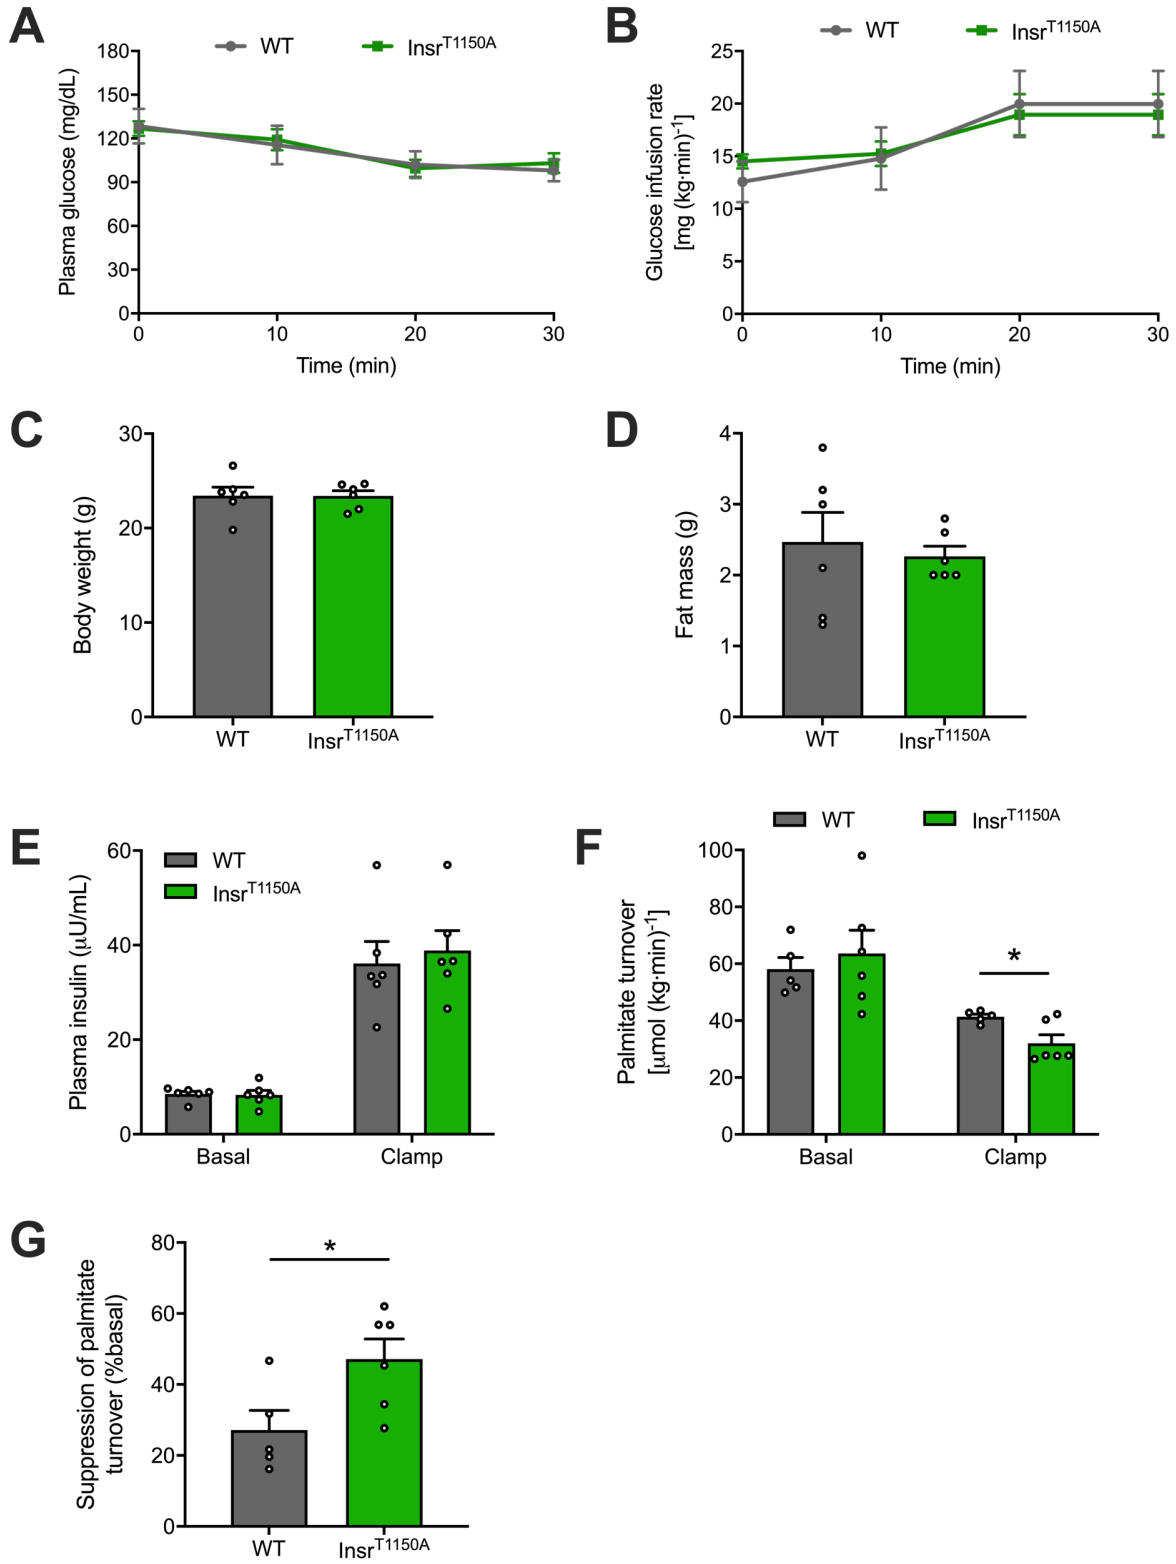

**Figure S4. Hyperinsulinemic-euglycemic clamp studies in WT versus *Insr*<sup>T1150A</sup> mice**

(A)-(B) Time course of plasma glucose and glucose infusion rates. (C)-(D) Body weight and fat mass. (E) Plasma insulin concentrations under basal and clamp conditions. (F)-(G) Whole-body palmitate turnover and its suppression by insulin during the hyperinsulinemic-euglycemic clamp.

In all panels, data are the mean  $\pm$  SEM of  $n = 6$  per group, with comparisons by 2-tailed unpaired

Student's t-test. \* $P < 0.05$ .



**Table S1. Characteristics of rats in hyperinsulinemic-euglycemic clamp cohort**

| Parameters                    | RC           | 7-day HFD   |
|-------------------------------|--------------|-------------|
| Body weight (g)               | 309.0 ± 4.6  | 315.9 ± 4.5 |
| Basal plasma glucose (mg/dL)  | 118.9 ± 4.80 | 113.0 ± 2.5 |
| Basal plasma insulin (μU/mL)  | 7.3 ± 1.5    | 9.7 ± 1.3   |
| Clamp plasma glucose (mg/dL)  | 112.6 ± 4.1  | 123.3 ± 5.0 |
| Clamp plasma insulin (μU /mL) | 75.7 ± 4.9   | 78.5 ± 7.4  |

Data are presented as mean ± SEM of  $n = 8-10$  per group, with comparisons by the 2-tailed unpaired Student's t-test.

**Table S2. Characteristics of *Insr*<sup>T1150A</sup> mice in hyperinsulinemic-euglycemic clamp cohort**

| Parameters                   | WT           | <i>Insr</i> <sup>T1150A</sup> |
|------------------------------|--------------|-------------------------------|
| Body weight (g)              | 24.4 ± 0.9   | 23.6 ± 0.4                    |
| Fat mass (g)                 | 2.7 ± 0.4    | 2.4 ± 0.2                     |
| Basal plasma glucose (mg/dL) | 128.5 ± 11.9 | 126.8 ± 4.9                   |
| Basal plasma insulin (μU/mL) | 8.5 ± 0.6    | 8.3 ± 0.9                     |
| Clamp plasma glucose (mg/dL) | 98 ± 7.4     | 103 ± 6.8                     |
| Clamp plasma insulin (μU/mL) | 36.1 ± 4.7   | 38.9 ± 4.2                    |

Data are presented as mean ± SEM of  $n = 6$  per group, with comparisons by the 2-tailed unpaired Student's t-test.

**Table S3. Content of WAT sn-1,2-DAG individual species in RC- versus 7-day HFD-fed rats**

| sn-1,2-DAGs (nmol/g) | PM            |               |       | Mito          |               |       | ER            |               |       |
|----------------------|---------------|---------------|-------|---------------|---------------|-------|---------------|---------------|-------|
|                      | RC            | HFD           | P     | RC            | HFD           | P     | RC            | HFD           | P     |
| <b>C16:0 C16:0</b>   | 0.077 ± 0.008 | 0.166 ± 0.018 | 0.004 | 0.220 ± 0.008 | 0.205 ± 0.062 | 0.789 | 0.814 ± 0.039 | 0.854 ± 0.234 | 0.855 |
| <b>C16:0 C18:2</b>   | 0.155 ± 0.006 | 0.349 ± 0.031 | 0.001 | 0.451 ± 0.032 | 0.436 ± 0.095 | 0.874 | 1.846 ± 0.570 | 2.525 ± 0.985 | 0.550 |
| <b>C18:1 C16:0</b>   | 0.065 ± 0.004 | 0.137 ± 0.011 | 0.001 | 0.188 ± 0.002 | 0.169 ± 0.045 | 0.654 | 0.689 ± 0.178 | 0.864 ± 0.381 | 0.667 |
| <b>C18:0 C16:0</b>   | 0.020 ± 0.003 | 0.031 ± 0.002 | 0.022 | 0.033 ± 0.001 | 0.035 ± 0.007 | 0.739 | 0.102 ± 0.004 | 0.122 ± 0.030 | 0.487 |
| <b>C16:0 C20:4</b>   | 0.003 ± 0.000 | 0.005 ± 0.001 | 0.038 | 0.008 ± 0.002 | 0.005 ± 0.002 | 0.310 | 0.017 ± 0.004 | 0.018 ± 0.003 | 0.810 |
| <b>C18:2 C18:2</b>   | 0.028 ± 0.003 | 0.111 ± 0.021 | 0.007 | 0.138 ± 0.019 | 0.160 ± 0.018 | 0.447 | 0.620 ± 0.262 | 1.301 ± 0.482 | 0.229 |
| <b>C18:1 C18:2</b>   | 0.063 ± 0.005 | 0.124 ± 0.018 | 0.019 | 0.196 ± 0.021 | 0.188 ± 0.028 | 0.818 | 0.721 ± 0.243 | 1.033 ± 0.371 | 0.489 |
| <b>C18:1 C18:1</b>   | 0.083 ± 0.003 | 0.119 ± 0.016 | 0.080 | 0.183 ± 0.011 | 0.171 ± 0.042 | 0.778 | 0.631 ± 0.178 | 0.767 ± 0.278 | 0.680 |
| <b>C18:2 C18:0</b>   | 0.024 ± 0.002 | 0.048 ± 0.004 | 0.003 | 0.053 ± 0.005 | 0.054 ± 0.007 | 0.855 | 0.177 ± 0.044 | 0.259 ± 0.078 | 0.363 |
| <b>C18:1 C18:0</b>   | 0.016 ± 0.002 | 0.022 ± 0.001 | 0.035 | 0.028 ± 0.002 | 0.023 ± 0.005 | 0.380 | 0.105 ± 0.020 | 0.116 ± 0.038 | 0.800 |
| <b>C18:0 C18:0</b>   | 0.131 ± 0.003 | 0.129 ± 0.005 | 0.711 | 0.111 ± 0.003 | 0.118 ± 0.003 | 0.175 | 0.130 ± 0.010 | 0.119 ± 0.007 | 0.451 |
| <b>C18:0 C20:4</b>   | 0.013 ± 0.007 | 0.021 ± 0.009 | 0.562 | 0.013 ± 0.003 | 0.021 ± 0.005 | 0.189 | 0.036 ± 0.007 | 0.028 ± 0.004 | 0.386 |

| sn-1,2-DAGs (nmol/g) | Cytosol       |               |       | LD            |               |       |
|----------------------|---------------|---------------|-------|---------------|---------------|-------|
|                      | RC            | HFD           | P     | RC            | HFD           | P     |
| <b>C16:0 C16:0</b>   | 0.134 ± 0.027 | 0.141 ± 0.036 | 0.883 | 5.294 ± 1.182 | 4.835 ± 1.247 | 0.799 |
| <b>C16:0 C18:2</b>   | 0.284 ± 0.094 | 0.396 ± 0.202 | 0.606 | 21.89 ± 5.269 | 27.98 ± 6.847 | 0.496 |
| <b>C18:1 C16:0</b>   | 0.138 ± 0.038 | 0.145 ± 0.049 | 0.915 | 8.339 ± 1.994 | 8.753 ± 2.270 | 0.894 |
| <b>C18:0 C16:0</b>   | 0.022 ± 0.003 | 0.027 ± 0.004 | 0.307 | 0.729 ± 0.173 | 0.802 ± 0.240 | 0.807 |
| <b>C16:0 C20:4</b>   | 0.005 ± 0.001 | 0.003 ± 0.001 | 0.135 | 0.108 ± 0.030 | 0.138 ± 0.031 | 0.514 |
| <b>C18:2 C18:2</b>   | 0.065 ± 0.028 | 0.175 ± 0.094 | 0.256 | 8.132 ± 2.155 | 17.33 ± 4.614 | 0.093 |
| <b>C18:1 C18:2</b>   | 0.075 ± 0.025 | 0.137 ± 0.071 | 0.390 | 7.727 ± 1.939 | 11.27 ± 2.905 | 0.328 |
| <b>C18:1 C18:1</b>   | 0.088 ± 0.027 | 0.122 ± 0.036 | 0.473 | 7.821 ± 2.015 | 9.702 ± 2.860 | 0.597 |
| <b>C18:2 C18:0</b>   | 0.036 ± 0.012 | 0.041 ± 0.017 | 0.785 | 1.594 ± 0.400 | 2.467 ± 0.680 | 0.283 |
| <b>C18:1 C18:0</b>   | 0.015 ± 0.002 | 0.015 ± 0.005 | 0.995 | 1.051 ± 0.280 | 1.248 ± 0.392 | 0.687 |
| <b>C18:0 C18:0</b>   | 0.118 ± 0.004 | 0.108 ± 0.004 | 0.130 | 0.312 ± 0.051 | 0.308 ± 0.054 | 0.960 |
| <b>C18:0 C20:4</b>   | 0.011 ± 0.006 | 0.004 ± 0.001 | 0.385 | 0.058 ± 0.016 | 0.079 ± 0.019 | 0.414 |

Data are presented as mean ± SEM of  $n = 4-5$  per group, with comparisons by the 2-tailed unpaired Student's t-test.
